# Supplementary material
Source: PubMed Central journal article supplement (PMC4670990)
Supplement: cr2015130x1.pdf [file cr2015130x1.pdf]

**A**

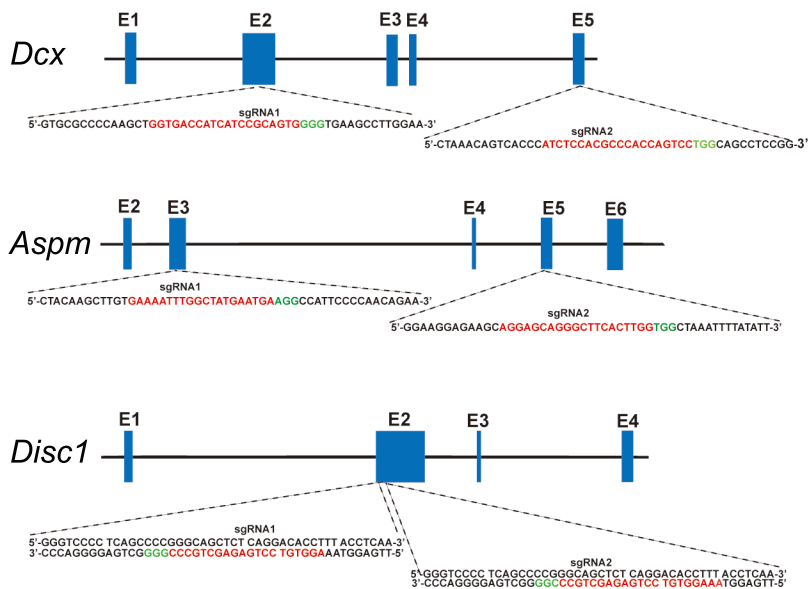

**B**

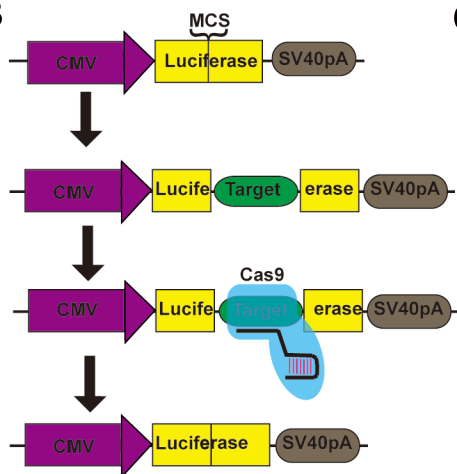

**C**

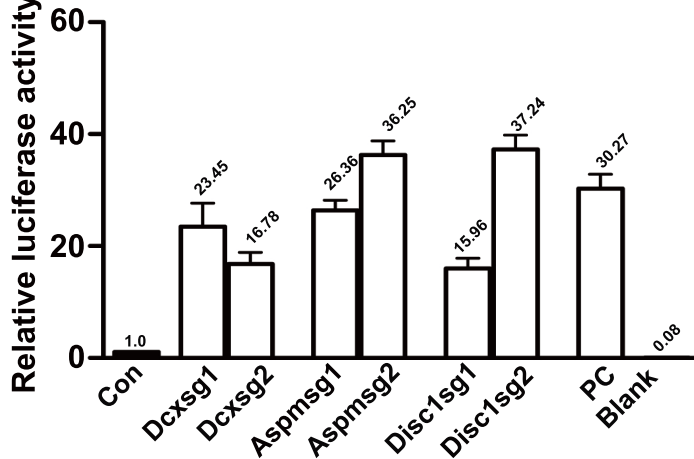

**D**

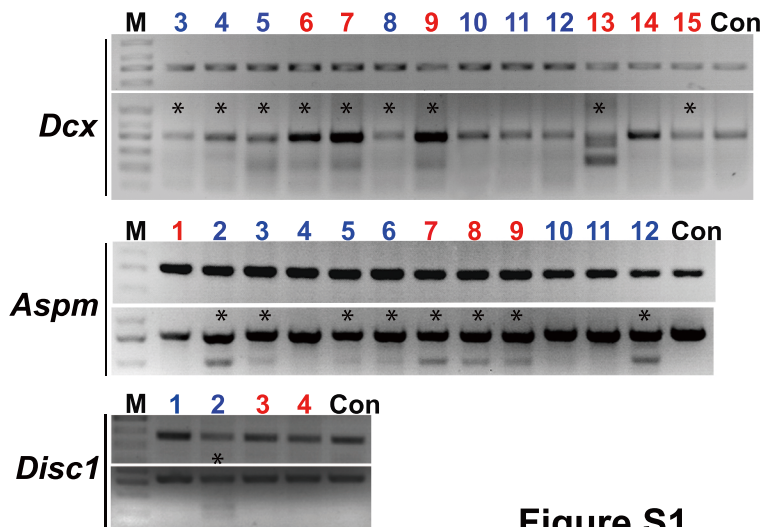

**Figure S1**

E

|              |                                                       |             |
|--------------|-------------------------------------------------------|-------------|
| <i>Dcx</i>   | GCGCCCCAAGCTGGTGACCATCATCCGCAGTGGGGTGAAGCCTTGGAA      | (WT)        |
| #3           | GCGCCCCAAGCTGGTGACCATCATCCGCAGTGGGGTGAAGCCTTGGAA      | (+1, 16/20) |
|              | GCGCCCCAAGCTGGTGACCATCATCC : : : : GGGGTGAAGCCTTGGAA  | (-5, 2/20)  |
| #4           | GCGCCCCAAGCTGGTGACCA : : : : : AGTGGGGTGAAGCCTTGGAA   | (-8, 18/20) |
| #5           | GCGCCCCAAGCTGGTGACCATCATCCGC : : : GGGTGAAGCCTTGGAA   | (-4, 11/20) |
|              | GCGCC : : : : : GA : : : : : TGGGGTGAAGCCTTGGAA       | (-23, 5/20) |
| #6           | GCGCCCCAAGCTGGTGACCATCATCCGCAGTGGGGTGAAGCCTTGGAA      | (+1, 16/20) |
|              | GCGCCCCAAGCT : : : : : : : : : : GGTGAAGCCTTGGAA      | (-21, 2/20) |
| #7           | GCGCCCCAAGCTGGTGACCATCATCC : : : GGGGTGAAGCCTTGGAA    | (-5, 9/20)  |
|              | GCGCCCC : : : : : : : : : : AAGCCTTGGAA               | (-30, 8/20) |
|              | GCGCCCCAAGCTGGTGACCATCATCCGCAGTGGGGTGAAGCCTTGGAA      | (+1, 2/20)  |
| #8           | GCGCCCCAAGCTGGTGACCATCATCCGCAGTGGGGTGAAGCCTTGGAA      | (+1, 15/20) |
|              | GCGCCCCAAGCT : : : : : : : : : : GGTGAAGCCTTGGAA      | (-21, 2/20) |
| #9           | GCGCCCCAAGCTGGTGACCATCATCC : : : GGGGTGAAGCCTTGGAA    | (-5, 10/20) |
|              | GCGCCCCAAGC : : : : : : : : : : GGGGTGAAGCCTTGGAA     | (-20, 7/20) |
|              | GCGCCCC : : : : : : : : : : AAGCCTTGGAA               | (-30, 2/20) |
| #13          | GCGCCCCAAGCT : : : : : : : : : : GGTGAAGCCTTGGAA      | (-21, 7/20) |
|              | GCGCCCCAAGCTGGTGACCATCATCCGCAGTGGGGTGAAGCCTTGGAA      | (-98, 7/20) |
|              | GCGCCCCAAGCTGGTGACCATCATCCGCAGTGGGGTGAAGCCTTGGAA      | (+1, 3/20)  |
| #15          | GCGCCCCAAGCTGGTGACCATCATCCGCAGTGGGGTGAAGCCTTGGAA      | (+1, 9/20)  |
|              | GCGCCCCAAGC : : : : : : : : : : TGGGGTGAAGCCTTGGAA    | (-19, 6/20) |
| <i>Aspm</i>  | GGAAGGAGAAGCAGGAGCAGGGCTTCACTTGGTGGCTAAATTTTATATT     | (WT)        |
| #2           | GGAAGGAGAAGCAGGAGCAGGG : : : : CTTGGTGGCTAAATTTTATATT | (-5, 12/20) |
|              | GGAAGGAGAAGCAGGAGCAG : : : : : GGCTAAATTTTATATT       | (-13, 7/20) |
| #3           | GGAAGGAGAAGCAGGAGCAGGG : : : : CTTGGTGGCTAAATTTTATATT | (-5, 10/20) |
|              | GGAAGGAGAAGCAGGAGCAGGGCTT : : CTTGGTGGCTAAATTTTATATT  | (-2, 6/20)  |
| #5           | GGAAGGAGAAGCAGGAGCAGGG : : : : CTTGGTGGCTAAATTTTATATT | (-5, 8/20)  |
|              | GGAAGGAGAAGCAGGAGCAGGGCTT : : TGGTGGCTAAATTTTATATT    | (-3, 8/20)  |
|              | GGAAGGAGAAGCAGGAGCAGGGCTT : : CTTGGTGGCTAAA TTTTATATT | (-2, 3/20)  |
| <i>Disc1</i> | AAGCTTGAGGTAAAGGTGTCTTGAGAGCTGCCGGGGCTGAGGGGACC       | (WT)        |
| #2           | AAGCTTGAGGTAAAGGTGTCTTGAGAGC : : : CCGGGGCTGAGGGGACC  | (-3, 11/20) |
|              | AAGCTTGAGGTAAAGGTGTCTTGAGAGCTGCCGGGGCTGAGGGGACC       | (+1, 4/20)  |

F

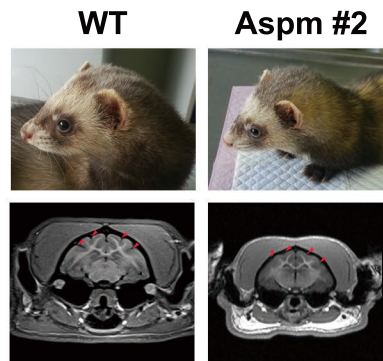

Figure S1

**A**

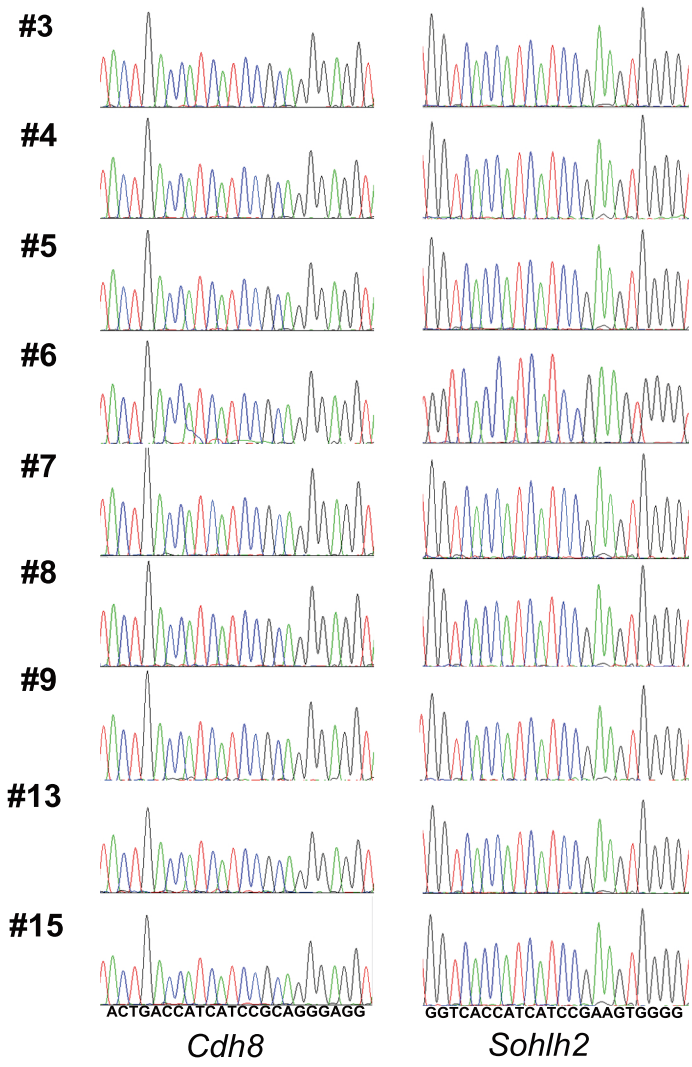

**B**

|        |                  |                         |              |                        |
|--------|------------------|-------------------------|--------------|------------------------|
| Cdh8   | CCCCACCCAGGGACT  | ACTGACCATCATCCGCAGGGAGG | TATTGAAATGGG | WT                     |
|        | CCCCACCCAGGGACT  | ACTGACCATCATCCGCAGGGAGG | TATTGAAATGGG | <i>Dcx</i> #1 (20/20)  |
|        | CCCCACCCAGGGACT  | ACTGACCATCATCCGCAGGGAGG | TATTGAAATGGG | <i>Dcx</i> #2 (20/20)  |
|        | CCCCACCCAGGGACT  | ACTGACCATCATCCGCAGGGAGG | TATTGAAATGGG | <i>Dcx</i> #4 (20/20)  |
|        | CCCCACCCAGGGACT  | ACTGACCATCATCCGCAGGGAGG | TATTGAAATGGG | <i>Dcx</i> #7 (20/20)  |
|        | CCCCACCCAGGGACT  | ACTGACCATCATCCGCAGGGAGG | TATTGAAATGGG | <i>Dcx</i> #9 (20/20)  |
|        | CCCCACCCAGGGACT  | ACTGACCATCATCCGCAGGGAGG | TATTGAAATGGG | <i>Dcx</i> #15 (20/20) |
| Sohlh2 | TCATCCGGCCCAAGCT | GGTCACCATCATCCGAAGTGGG  | TGAAGCCACGGA | WT                     |
|        | TCATCCGGCCCAAGCT | GGTCACCATCATCCGAAGTGGG  | TGAAGCCACGGA | <i>Dcx</i> #1 (20/20)  |
|        | TCATCCGGCCCAAGCT | GGTCACCATCATCCGAAGTGGG  | TGAAGCCACGGA | <i>Dcx</i> #2 (20/20)  |
|        | TCATCCGGCCCAAGCT | GGTCACCATCATCCGAAGTGGG  | TGAAGCCACGGA | <i>Dcx</i> #4 (20/20)  |
|        | TCATCCGGCCCAAGCT | GGTCACCATCATCCGAAGTGGG  | TGAAGCCACGGA | <i>Dcx</i> #7 (20/20)  |
|        | TCATCCGGCCCAAGCT | GGTCACCATCATCCGAAGTGGG  | TGAAGCCACGGA | <i>Dcx</i> #9 (20/20)  |
|        | TCATCCGGCCCAAGCT | GGTCACCATCATCCGAAGTGGG  | TGAAGCCACGGA | <i>Dcx</i> #15 (20/20) |

**Figure S2**

**Table S1A. Summary of embryo microinjection of Cas9 mRNA and sgRNAs**

| Gene  | Injected Embryos | Embryos for ET | Surrogates (Pregnancies) | Fetuses | Knockout Fetuses(Dead),<br>Knockout Rate | Survived Knockout Fetuses<br>Female/Male |
|-------|------------------|----------------|--------------------------|---------|------------------------------------------|------------------------------------------|
| Dcx   | 124              | 117            | 10(5)                    | 15      | 11(2), 73.3%                             | 5/4                                      |
| Aspm  | 64               | 64             | 4(2)                     | 12      | 8(0), 66.7%                              | 3/5                                      |
| Disc1 | 18               | 18             | 1(1)                     | 4       | 1(0), 25%                                | 0/1                                      |

**Table S1B. Oligonucleotides used for cloning the DNA segments of targeted genes**

| Gene Segment                         | Direction | Sequence (5' to 3')        |
|--------------------------------------|-----------|----------------------------|
| <i>Aspm</i> exon3(a540e3)            | F         | CACCGGAAAATTTGGCTATGAATGA  |
|                                      | R         | AAACTCATTTCATAGCCAAATTTTCC |
| <i>Aspm</i> exon3(a740e5)            | F         | CACCGAGCAGGAGCAGGGCTTCACT  |
|                                      | R         | AAACAGTGAAGCCCTGCTCCTGCTC  |
| <i>Dcx</i> exon2 ( <i>dcx660e2</i> ) | F         | CGAGGTGAGTTGTTAGAGAGACAG   |
|                                      | R         | CTCAGACATATGGTCCATTGCTTG   |
| <i>Dcx</i> exon5 ( <i>dcx450e4</i> ) | F         | CAGAGCCCTGTAATTGGAAG       |
|                                      | R         | CTTGATGCATTGCTGAAGTAG      |
| <i>Disc1</i> exon2 (d430e2)          | F         | TCCAAGTTGGCACCACACTG       |
|                                      | R         | GAGAGAGAAGTCGAGGGTGTTC     |
| <i>Disc1</i> exon2 (d430e2)          | F         | CCAAGTTGGCACCACACTG        |
|                                      | R         | GAGAGAGAAGTCGAGGGTGT       |

**Table S1C. Oligonucleotides used for cloning sgRNA expression vector**

| Gene Segment        | Direction | Sequence (5' to 3')        |
|---------------------|-----------|----------------------------|
| <i>Aspm</i> sgRNA1  | F         | CACCGGAAAATTTGGCTATGAATGA  |
|                     | R         | AAACTCATTTCATAGCCAAATTTTCC |
| <i>Aspm</i> sgRNA2  | F         | CACCGAGCAGGAGCAGGGCTTCACT  |
|                     | R         | AAACAGTGAAGCCCTGCTCCTGCTC  |
| <i>Dcx</i> sgRNA1   | F         | AAACAGTGAAGCCCTGCTCCTGCTC  |
|                     | R         | CACCGGGTGACCATCATCCGCAGTG  |
| <i>Dcx</i> sgRNA2   | F         | CACCGATCTCCACGCCACCAGTCC   |
|                     | R         | AAACGGACTGGTGGGCGTGGAGATC  |
| <i>Disc1</i> sgRNA1 | F         | CACCGAGGTGTCCTGAGAGCTGCCC  |
|                     | R         | AAACGGGCAGCTCTCAGGACACCTC  |
| <i>Disc1</i> sgRNA2 | F         | CACCGAAGGTGTCCTGAGAGCTGCC  |
|                     | R         | AAACGGCAGCTCTCAGGACACCTTC  |

**Table S1D. Oligonucleotides used for in vitro transcription**

| Gene Segment             | Direction | Sequence (5' to 3')                                |
|--------------------------|-----------|----------------------------------------------------|
| T7- <i>Dcx</i> -sgRNA1   | F         | ttaatacgactcactataggGGTGACCATCATCCGCAGTG           |
| T7- <i>Aspm</i> -sgRNA2  | F         | ttaatacgactcactataggAGGAGCAGGGCTTCACTTGG           |
| T7- <i>Disc1</i> -sgRNA2 | F         | ttaatacgactcactataggAAGGTGTCCTGAGAGCTGCC           |
| T7-sgRNA                 | R         | AAACAGTGAAGCCCTGCTCCTGCTC                          |
|                          |           |                                                    |
| T7-Cas9                  | F         | ttaatacgactcactataggGGAGAATGGACTATAAGGAC<br>CACGAC |
| T7-Cas9                  | R         | GCGAGCTCTAGGAATTCTTAC                              |

**Table S1E. Oligonucleotides used for T7EN1 assay**

| Gene Segment | Direction | Sequence (5' to 3')       |
|--------------|-----------|---------------------------|
| <i>Dcx</i>   | F         | CGAGGTGAGTTGTTAGAGAGACAG  |
|              | R         | CTCAGACATATGGTCCATTGCTTG  |
| <i>Aspm</i>  | F         | CACCGAGCAGGAGCAGGGCTTCACT |
|              | R         | AAACAGTGAAGCCCTGCTCCTGCTC |
| <i>Disc1</i> | F         | TCCAAGTTGGCACCACACTG      |
|              | R         | GAGAGAGAAGTCGAGGGTGTTTC   |

**Table S1F. Oligonucleotides used for off-target assay**

| Gene Segment  | Direction | Sequence (5' to 3')      |
|---------------|-----------|--------------------------|
| <i>Cdh8</i>   | F         | GCCTCTTAAACTCAAATTCATC   |
|               | R         | CAGGTATATGCTACACTCATAATG |
| <i>Sohlh2</i> | F         | CATCGGTGATGTCAGTGAGAAC   |
|               | R         | CCCTTCAAGAAACTGGAGTACAC  |

## **SUPPLEMENTARY INFORMATION**

### **EXPERIMENTAL PROCEDURES**

#### **Animals**

All animal procedures were performed according to protocol approved in advance by the Committee on Animal Care at the Institute of Biophysics, Chinese Academy of Sciences. Health Domestic Ferret (*Mustela putorius furo*) female, ranging in age from 1 to 3 years and having body weights of 1.2 to 2.0 kg, male ranging in age from 2 to 4 years and having body weights of 1.5 to 2.5 kg, were selected for use in this study. Female ferrets were in oestrus when delivered and non-vasectomized males were proven breeders. Eight vasectomized male ferrets were prepared 4 months in advance. After vasectomy, each male was mated repeatedly before a sperm count was carried out to confirm the sterile state of the animal. Sterility, as inferred by aspermia and the lack of pregnancy after three sequential matings with an oestrous ferret, was confirmed within 3 months of vasectomy in all eight males. All animals were housed under controlled temperature (20–22°C) and long day light cycles (16 h light: 8 h dark).

#### **Superovulation of ferrets**

For superovulation, female ferrets were intraperitoneally injected (i.p.) with 200-300IU PMSG (Pregnant Mare Serum Gonadotropin), followed by sequential 20 times injections of 5IU rhFSH (recombinant human follitropin alfa, GONAL-F, Merck Serono) (interval 12h) 48 h later, then injected 200-300IU hCG (human chorionic gonadotropin) (Merck Serono). Each female was mated with one male or with two males in succession immediately after hCG treatment. Oocytes or embryos were flushed and harvested from the oviducts or uterine horns with HCZB medium.

#### **Plasmids**

To validate the efficiency of sgRNA selected as described, we used the UCATM CRISPR/Cas9 kits (Biocytogen, Cat. BCG-DX-001). Following the kit instruction, ~500 bp genomic fragments containing sgRNA target sequence were PCR amplified and placed between the luciferase fragments, which is linearized with blunt end. The DNA

segments of targeted genes (*Aspm*, *Dcx*, *Disc1*) were amplified and sequenced. Primers for amplifying these segments were listed in Table S1B. sgRNA targets were selected by an online design tool Cas9 design (<http://crispr.mit.edu/> and <http://cas9.cbi.pku.edu.cn/>). The sgRNA expression vectors were constructed as described [1]. In brief, the sgRNA oligos (Supplementary information, Table S1C) were phosphorylated and annealed; the vector px330 (Addgene, 42230) and the annealed sgRNA oligos for each targeting site were digested with BbsI and ligated.

### **In Vitro Transcription**

T7 promoter was added to Cas9 coding region by PCR amplification using primer Cas9 F and R (Supplementary information, Table S1D). T7-Cas9 PCR product was gel-purified and used as the template for in vitro transcription (IVT) using mMESSAGE mMACHINE T7 ULTRA kit (Life Technologies). T7 promoter was added to sgRNAs template by PCR amplification using primer listed in Table S1D. The T7-sgRNA PCR product was gel-purified and used as the template for IVT using MEGAscript T7 kit (Life Technologies). Both the Cas9 mRNA and the sgRNAs were purified using MEGAclear kit (Life Technologies) and eluted in RNase-free water.

### **Hek293T cell culture and SSA reporter Assay**

HEK293T cells (ATCC, CRL-3216) were cultured in DMEM/high glucose (HyClone) with 10% FBS, penicillin (100 U/ml) and streptomycin (100 mg/ml);  $3 \times 10^4$  cells per well were plated in 96 well plate. Cells were grown to ~80% confluence and transfected using Lipofectamine 2000 (Life Technologies) with 20ng/well of pUCA-target plasmids and 80ng/well of Cas9 and sgRNA expression plasmids. The activity of luciferase was examined 24h after transfection with GloMax-Multi Detection System (Promega) follow the manufacturer's instruction.

### **Cas9/sgRNA Injection of One-Cell Embryos**

The zygotes were injected with a mixture of Cas9 mRNA (20ng/ $\mu$ l) and sgRNAs (30ng/ $\mu$ l). Microinjections were performed in the cytoplasm of zygotes using a Piezo-

drill micromanipulator (Origio, PIEZO-8-15). The injected zygotes were cultured in HCZB medium at 38.5°C in 5% CO<sub>2</sub> for 3h.

### **Embryo transfer**

A pseudopregnant state was achieved in recipient females mated with vasectomized males 12–24h after embryo donors were mated. ~ 15-18 injected embryos were transferred into the oviduct of the matched recipient ferret. The earliest pregnancy diagnosis was performed by touch about 21 days after the embryo transfer.

### **T7EN1 Cleavage Assay and Sequencing**

Samples were collected and the genomic DNA was extracted by AxyPrep Multisource Genomic DNA Miniprep Kit (Axygen, Cat.AP-MN-MS-GDNA-50) according to the manufacturer's instruction. T7EN1 cleavage assay was performed as described[2]. Briefly, targeted fragments were amplified by TransTaq DNA Polymerase High Fidelity (Transgene, Cat. AP131-02) from extracted genomic DNA, and purified with PCR cleanup kit (Axygen, Cat. AP-PCR- 50). Purified PCR product was denatured and re-annealed in NEBuffer 2 (NEB) using a thermocycler. Hybridized PCR products (300ng) were digested with T7EN1 (NEB, Cat. M0302L) for 30 min and separated by 2.0% agarose gel. PCR products with mutations detected by T7EN1 cleavage assay were sub-cloned into pMD-19T vector (Takara, D104A). For each sample, colonies were picked up randomly and sequenced by M13-47 primer. Primers for amplifying *Aspm*, *Dcx*, and *Disc1* targeted fragments and T7EN1 cleavage assay are listed in Table S1E.

### **Off-target Analysis**

All potential off-target sites with homology to the 23 bp sequence (sgRNA+PAM) were retrieved by blastn in NCBI, allowing for ungapped alignments with up to four mismatches in the sgRNA target sequence as described [3-6]. The potential off-target sites were amplified using tail genomic DNA as templates. PCR products were sub-cloned into pMD-19T vector (Takara, D104A). For each sample, colonies were picked up randomly and sequenced by M13-47 primer. The primers for amplifying the off-target sites are listed in Table S1F.

## SUPPLEMENTARY FIGURE LEGEND

### Figure S1. sgRNA:Cas9-Mediated Modification of *Dcx*, *Aspm* and *Disc1* in ferrets.

(A) Schematic diagram of sgRNAs targeting at *Dcx*, *Disc1* and *Aspm* loci. The Protospacer-adjacent motif (PAM) is labeled in green. sgRNA targeting sites are highlighted in red. (B) Luciferase assay to identify the efficiency of sgRNA:CAS9 system. Plasmid contains 5' and 3' Luciferase fragments that share ~800bp under ubiquitous CMV promoter, ~500 bp genomic fragment containing the target sequence was placed between luciferase fragments of pUCALucplasmid with stop codon following the first share fragment. The resulting target plasmid was cotransfected with pX330 plasmids expressing sgRNA and hCas9 into HEK293T cells. When the target sequence was digested by sgRNA guided CAS9 endonuclease, the homology dependent repair (HDR); homologous recombination (HR) or single strand annealing (SSA) took place and reconstituted the luciferase expression cassette. (C) Relative luciferase activity for the efficiency of sgRNA: Cas9-mediated cleavage of *Dcx*, *Disc1* and *Aspm*. The recombination assay shows luciferase activity with and without cleavage of the target site by the Cas9/sgRNA system in 293T cells. The luciferase activity increased by ~23.45 and 16.78 folds in the presence of Cas9 with *Dcx*-sgRNA1 and *Dcx*-sgRNA2, respectively. 26.36 and 36.25 fold increase with *Disc1*-sgRNA1 and *Disc1*-sgRNA2, and 15.96 and 37.24 fold increase with *Aspm*-sgRNA1 and *Aspm*-sgRNA2. Control group (Cas9 + empty vector). Error bars indicate SD, n = 8. sg1: sgRNA1; sg2, sgRNA2; Con, control; PC, positive control. (D) Detection of sgRNA: Cas9-mediated modification of *Dcx*, *Disc1* and *Aspm* by PCR and T7EN1 cleavage assay. M: marker; Con, control. Sample with cleavage bands were marked with an asterisk "\*". Female ferrets were marked in red and male ferrets were marked in blue. (E) The sequence of nine mutant alleles from *Dcx* #3, #4, #5, #6, #7, #8, #9, #13 and #15; three mutant alleles from *Aspm* #2, #3 and #5; one mutant allele from *Disc1* #2. The PAM sequences are underlined and highlighted in green; the targeting sequences in red; the mutations in blue, lower case; deletions (-), and insertions (+). N/N indicates positive colonies out of total sequenced. (F) MRI reveals the microcephalic brain of founder #2 after gene modification of *Aspm*. Red arrowheads indicate normal brain folds in wild type (left panel) but not in *Aspm* mutated ferret (right panel).

**Figure S2. Off-target analysis of ferrets with Dcx mutations.** (A) Sequences of PCR products from *Dcx* ferrets #3, #4, #5, #6, #7, #8, #9, #13 and #15 show no mutations in both potential off-target loci (*Cdh8* and *Sohlh2*). (B) 20 TA clones of *Cdh8* and *Sohlh2* PCR products were analyzed by DNA sequencing. The PAM sequences are in green; the targeting sequences are in red. N/N indicates positive colonies out of total sequenced. *Dcx* ferrets #1, #2, #4, #7, #9 and #15 were analyzed.

## SUPPLEMENTARY TABLE

**Table S1. Summary of embryo microinjection and oligonucleotides.** (A) Summary of embryo microinjection of Cas9 mRNA and sgRNAs. (B) Oligonucleotides used for cloning the DNA segments of targeted genes. (C) Oligonucleotides used for cloning sgRNA expression vector. (D) Oligonucleotides used for in vitro transcription. (E) Oligonucleotides used for T7EN1 assay. (F) Oligonucleotides used for off-target assay.

## SUPPLEMENTARY REFERENCE

- 1 Ran FA, Hsu PD, Lin CY *et al.* Double nicking by RNA-guided CRISPR Cas9 for enhanced genome editing specificity. *Cell* 2013; **154**:1380-1389.
- 2 Niu Y, Shen B, Cui Y *et al.* Generation of gene-modified cynomolgus monkey via Cas9/RNA-mediated gene targeting in one-cell embryos. *Cell* 2014; **156**:836-843.
- 3 Cho SW, Kim S, Kim JM, Kim JS. Targeted genome engineering in human cells with the Cas9 RNA-guided endonuclease. *Nature biotechnology* 2013; **31**:230-232.
- 4 Hsu PD, Scott DA, Weinstein JA *et al.* DNA targeting specificity of RNA-guided Cas9 nucleases. *Nature biotechnology* 2013; **31**:827-832.
- 5 Pattanayak V, Lin S, Guilinger JP, Ma E, Doudna JA, Liu DR. High-throughput profiling of off-target DNA cleavage reveals RNA-programmed Cas9 nuclease specificity. *Nature biotechnology* 2013; **31**:839-843.
- 6 Wang H, Yang H, Shivalila CS *et al.* One-step generation of mice carrying mutations in multiple genes by CRISPR/Cas-mediated genome engineering. *Cell* 2013; **153**:910-918.
